# Supplementary material
Source: publisher figshare collection journal article supplement (https://rs.figshare.com/ndownloader/files/24208448)
Supplement: Supplementary file 1 [file 24208448]

## Sheet: Sheet1
SN	Year	Month	Day	Dispersal season	Direction	Location	State	Notes	Facebook or WhatsApp (Butterfly Migration WhatsApp group) Social Group
1	2013	10	14	Post-monsoon dispersal	West	Mysuru	Karnataka		Butterflies of India Facebook group
2	2013	10	17	Post-monsoon dispersal	West	Bengaluru	Karnataka		Bengaluru Butterfly Club Facebook group
3	2013	10	17	Post-monsoon dispersal	South	Bannerghatta–Anekal Road	Karnataka		Bengaluru Butterfly Club Facebook group
4	2014	6	30	Pre-monsoon dispersal	East	Bannerghatta road	Karnataka		Bengaluru Butterfly Club Facebook group
5	2014	6	30	Pre-monsoon dispersal	East	Agara	Karnataka		Bengaluru Butterfly Club Facebook group
6	2014	6	30	Pre-monsoon dispersal	East	Sarjapura flyover	Karnataka		Bengaluru Butterfly Club Facebook group
7	2014	6	30	Pre-monsoon dispersal	East	Hesarghatta	Karnataka		Bengaluru Butterfly Club Facebook group
8	2014	8	22	Pre-monsoon dispersal	East	JP Nagar reserve forest	Karnataka		Bengaluru Butterfly Club Facebook group
9	2014	9	24	Pre-monsoon dispersal	West	Nanjangud	Karnataka	Nanjangud-Bandipur, towards Calicut till Gudalur	Bengaluru Butterfly Club Facebook group
10	2015	3	10	Pre-monsoon dispersal	North-east	Eravikulam	Kerala	Eravikulam region towards Chinnar	Butterflies of India Facebook group
11	2015	5	15	Pre-monsoon dispersal	West	Bannerghatta road	Karnataka		Bengaluru Butterfly Club Facebook group
12	2015	5	15	Pre-monsoon dispersal	North	CV Raman Nagar	Karnataka		Bengaluru Butterfly Club Facebook group
13	2015	5	15	Pre-monsoon dispersal	North-west	Hosur Road	Karnataka	Hosur Road along Electronics City towards Madivala	Butterflies of India Facebook group
14	2017	5	13	Pre-monsoon dispersal	North	Karwar, Udupi	Karnataka		Butterflies of India Facebook group
15	2017	5	18	Pre-monsoon dispersal	East	Karwar, Udupi	Karnataka	18–20/min	Butterflies of India Facebook group
16	2017	5		Pre-monsoon dispersal	South-east	Mangalore	Karnataka		Bengaluru Butterfly Club Facebook group
17	2017	6	4	Pre-monsoon dispersal	North	JP Nagar reserve forest	Karnataka		Bengaluru Butterfly Club Facebook group
18	2017	9	19	Post-monsoon dispersal	West	Tirupati	Andhra Pradesh		Butterflies of India Facebook group
19	2017	10	11	Post-monsoon dispersal	South	Bellary Road	Karnataka	60–70/min	Bengaluru Butterfly Club Facebook group
20	2018	7	3	Pre-monsoon dispersal	East	Rajapalyam	Tamil Nadu		Butterflies of India Facebook group
21	2018	10		Post-monsoon dispersal	South-west	Tamil Nadu, various	Tamil Nadu		Butterfly Migration WhatsApp group
22	2018	10		Post-monsoon dispersal	North-west	Tamil Nadu, various	Tamil Nadu		Butterfly Migration WhatsApp group
23	2019	7	11	Pre-monsoon dispersal	North-east	Bengaluru	Karnataka	60–70/min	Bengaluru Butterfly Club Facebook group
24	2019	8	25	Post-monsoon dispersal	South	Chennai	Tamil Nadu		Butterfly Migration WhatsApp group
25	2019	9	11	Post-monsoon dispersal	South-west	Madurai	Tamil Nadu		Butterfly Migration WhatsApp group
26	2019	9	13	Post-monsoon dispersal	East	Tidel Park Chennai	Tamil Nadu	40/min	Butterfly Migration WhatsApp group
27	2019	9	14	Post-monsoon dispersal	North	Bengaluru	Karnataka		Butterfly Migration WhatsApp group
29	2019	9	14	Post-monsoon dispersal	South	Bengaluru	Karnataka	60–70/min	Butterfly Migration WhatsApp group
30	2019	9	27	Post-monsoon dispersal	South-west	Lalith Mahal, Mysuru	Karnataka	40–45/min	Butterfly Migration WhatsApp group
31	2019	10	5	Post-monsoon dispersal	West	Honey Valley, Coorg	Karnataka		Butterfly Migration WhatsApp group
32	2019	10	7	Post-monsoon dispersal	West	Parambikulam	Kerala		Butterfly Migration WhatsApp group
33	2019	10	10	Post-monsoon dispersal	West	Othakaalmandapam, Coimbatore	Tamil Nadu	150/min	Butterfly Migration WhatsApp group
34	2019	10	11	Post-monsoon dispersal	South-west	Muthur to Kangayam	Tamil Nadu	22/min	Butterfly Migration WhatsApp group
			Pre-monsoon dispersal
			Post-monsoon dispersal
